# Supplementary material
Source: publisher site journal article supplement (https://www.dovepress.com/get_supplementary_file.php?f=265520.docx)
Supplement: Supplementary file 1 [file get_supplementary_file.php]

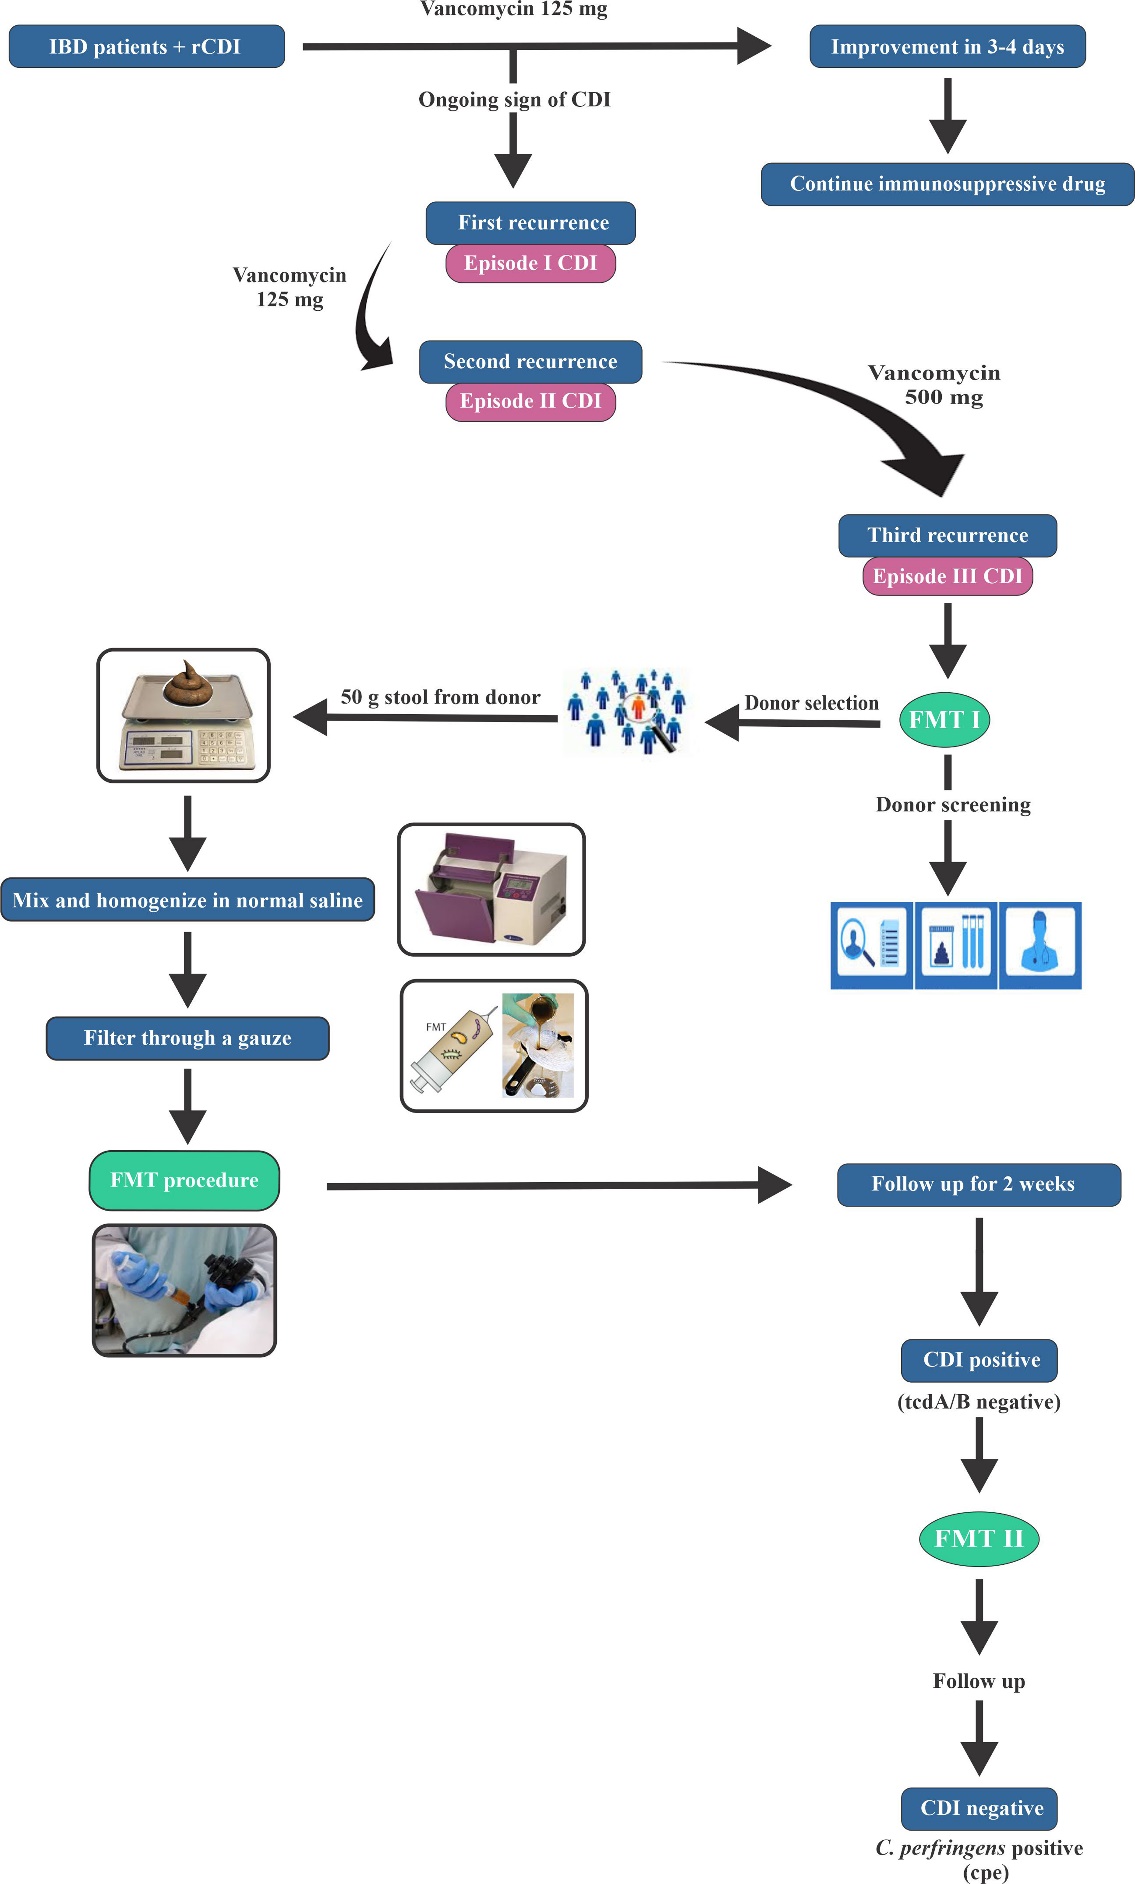


**Supplementary Figure 1.** Schematic workflow of FMT in rCDI patients with underlying IBD.

| **Patients** | **Age** **(years)** | **Sex** | **Diagnosis/duration (years)** | **Antibiotic therapy in 1st rCDI treatment** | **Antibiotic therapy in 2nd rCDI treatment** | **Antibiotic therapy in 3rd rCDI treatment** | **Concomitant therapy before FMT** | **CDI severity** | **Number of FMT** | **Sex/age (years) of donor** | **Relation to donor** |
| --- | --- | --- | --- | --- | --- | --- | --- | --- | --- | --- | --- |
| 1 | 45 | M | UC/10 | Vancomycin 125 mg given 4 times daily for 10 days | Vancomycin 500 mg given 4 times daily for 10 days | Vancomycin 500 mg given 4 times daily for 10 days | Anti-TNF alpha (infliximab) 40 mg/fortnight, Asacol tablets 3200 mg/day, one Asacol suppository every night, one Asacol enema every night, Azathioprine tablet 200 mg/day | Mild-to-moderate | 2 | F/40 | Brother |
| 2 | 37 | M | UC/5 | Vancomycin 125 mg given 4 times daily for 10 days | Vancomycin 500 mg given 4 times daily for 10 days | Vancomycin 500 mg given 4 times daily for 10 days | Anti-TNF alpha (infliximab) 40 mg/ fortnight, Azathioprine tablet 200 mg/day, Sulfasalazine 2000 mg/day | Mild-to-moderate | 1 | F/35 | Friend |
| 3 | 60 | F | UC/8 | Vancomycin 125 mg given 4 times daily for 10 days | Vancomycin 500 mg given 4 times daily for 10 days | Vancomycin 500 mg given 4 times daily for 10 days | Anti-TNF alpha (infliximab) 40 mg/fortnight, Azathioprine tablet 200 mg/day | Mild-to-moderate | 1 | M/38 | Son-in-law |
| 4 | 24 | M | UC/5 | Vancomycin 125 mg given 4 times daily for 10 days | Vancomycin 500 mg given 4 times daily for 10 days | Vancomycin 500 mg given 4 times daily for 10 days | Anti-TNF alpha (infliximab) 40 mg/fortnight, Asacol tablets 3200 mg/day, one Asacol suppository every night, one Asacol enema every night, Azathioprine tablet 200 mg/day | Mild-to-moderate | 2 | M/57 | Father |
| 5 | 22 | F | CD/3 | Vancomycin 125 mg given 4 times daily for 10 days | Vancomycin 500 mg given 4 times daily for 10 days | Vancomycin 500 mg given 4 times daily for 10 days | Anti-TNF alpha (infliximab) 40 mg/fortnight, Azathioprine tablet 200 mg/day | Mild-to-moderate | 1 | F/25 | Sister |
| 6 | 52 | M | UC/5 | Vancomycin 125 mg given 4 times daily for 10 days | Vancomycin 500 mg given 4 times daily for 10 days | Vancomycin 500 mg given 4 times daily for 10 days | Anti-TNF alpha (infliximab) 40 mg/fortnight, Asacol tablets 3200 mg/day, one Asacol suppository every night, one Asacol enema every night | Mild-to-moderate | 1 | M/38 | Cousin |
| 7 | 33 | M | UC/5 | Vancomycin 125 mg given 4 times daily for 10 days | Vancomycin 500 mg given 4 times daily for 10 days | Vancomycin 500 mg given 4 times daily for 10 days | Anti-TNF alpha (infliximab) 40 mg/fortnight, Asacol tablets 3200 mg/day, one Asacol suppository every night, one Asacol enema every night | Mild-to-moderate | 1 | M/37 | Brother |
| 8 | 23 | M | UC/3 | Vancomycin 125 mg given 4 times daily for 10 days | Vancomycin 500 mg given 4 times daily for 10 days | Vancomycin 500 mg given 4 times daily for 10 days | Anti-TNF alpha (infliximab) 40 mg/fortnight, Asacol tablets 3200 mg/day, one Asacol suppository every night, one Asacol enema every night | Mild-to-moderate | 1 | F/58 | Mother |

**Supplementary Table 1** Baseline characteristics of the study patients and their FMT donors

**Abbreviations:** CD, Crohn’s disease; F, female; M, male; UC, ulcerative colitis.
